# Supplementary material
Source: PubMed Central journal article supplement (PMC3502696)
Supplement: NIHMS404142-supplement-1_si_001.pdf [file NIHMS404142-supplement-1_si_001.pdf]

# **Solution Structure of Duplex DNA Containing a $\beta$ -Carba-Fapy-dG Lesion**

Mark Lukin, Tatiana Zaliznyak, Sivaprasad Attaluri, Francis Johnson and Carlos de los Santos\*

Department of Pharmacological Sciences. Stony Brook University-School of Medicine. Stony Brook, NY, 11794-8651

## **SUPPORTING INFORMATION**

Proton chemical shifts (Table 1S) on the  $\beta$ -cFapy-dG•dC duplex measured at 25 °C. One dimensional proton spectrum of the  $\beta$ -cFapy-dG•dC duplex recorded in 100% D<sub>2</sub>O buffer at 25 °C (Figure 1S), full 'finger print' region assignments on a 300 ms mixing time NOESY spectrum, recorded in 100% D<sub>2</sub>O buffer at 25 °C for the damaged (Figure 2SA) and undamaged (Figure 2SB) strands of the duplex, and expanded contour plot of the aromatic proton region on a 300 ms mixing time NOESY spectrum recorded in 100% D<sub>2</sub>O buffer at 25 °C (Figure 3S). Three-dimensional view of the twenty five *Z*- (Figure 4S) and *E*- (Figure 5S)  $\beta$ -cFapy-dG•dC duplex structures, and examples of water-mediated hydrogen bonds in the  $\beta$ -cFapy-dG•dC duplex (Figure 6S). UV<sub>260</sub> melting curves for the  $\beta$ -cFapy-dG•dC and dG•dC duplexes (Figure 7S).

| Table 1S. Proton chemical shifts on the $\beta$ -cFapy-dG•dC duplex at 25 °C. |       |      |      |      |      |      |          |                 |                   |
|-------------------------------------------------------------------------------|-------|------|------|------|------|------|----------|-----------------|-------------------|
|                                                                               | H6/H8 | H1'  | H2'' | H2'  | H3'  | H4'  | Me/H5/H2 | G(H1)/T<br>(H3) | CN <sub>4</sub> H |
| C1                                                                            | 7.59  | 5.74 | 2.39 | 1.98 | 4.66 | 4.03 | 5.85     |                 |                   |
| G2                                                                            | 7.93  | 5.95 | 2.76 | 2.64 | 4.94 | 4.33 |          | 12.81           |                   |
| (Z)T3                                                                         | 7.23  | 5.71 | 2.47 | 2.11 | 4.85 |      | 1.48     | 13.50           |                   |
| (E)T3                                                                         | 7.23  | 5.73 | 2.47 | 2.11 | 4.85 |      | 1.48     | 13.50           |                   |
| (Z)A4                                                                         | 8.22  | 6.22 | 2.86 | 2.65 | 4.98 | 4.40 | 7.45     |                 |                   |
| (E)A4                                                                         | 8.22  | 6.21 | 2.86 | 2.64 | 4.97 | 4.40 | 7.42     |                 |                   |
| (Z)C5                                                                         | 7.35  | 5.90 | 2.37 | 2.10 | 4.80 |      | 5.29     |                 | 8.28/6.64         |
| (E)C5                                                                         | 7.27  | 5.89 | 2.30 | 2.00 | 4.76 |      | 5.20     |                 | 8.22/6.76         |
| (Z)F6                                                                         | 7.92  | 3.91 | 1.89 | 1.70 | 4.40 | 2.16 |          | 12.56           |                   |
| (E)F6                                                                         | 7.21  | 3.83 | 1.90 | 1.72 | 4.41 | 2.17 |          | 12.63           |                   |
| (Z)C7                                                                         | 7.50  | 5.91 | 2.53 | 2.14 | 4.87 | 4.23 | 5.65     |                 | 8.59/6.90         |
| (E)C7                                                                         | 7.54  | 5.86 | 2.50 | 2.13 | 4.85 |      | 5.69     |                 | 8.39/6.76         |
| (Z)A8                                                                         | 8.23  | 6.20 | 2.65 | 2.89 | 4.97 | 4.35 | 7.59     |                 |                   |
| (E)A8                                                                         | 8.26  | 6.20 | 2.64 | 2.90 | 4.97 | 4.35 |          |                 |                   |
| T9                                                                            | 7.08  | 5.72 | 2.32 | 1.94 | 4.82 |      | 1.37     | 13.57           |                   |
| G10                                                                           | 7.81  | 5.88 | 2.55 | 2.65 | 4.92 | 4.32 |          | 12.74           |                   |
| C11                                                                           | 7.38  | 6.13 | 2.13 | 2.16 | 4.44 | 4.01 | 5.33     |                 | 8.15/6.62         |
|                                                                               |       |      |      |      |      |      |          |                 |                   |
| G12                                                                           | 7.89  | 5.92 | 2.56 | 2.74 | 4.80 | 4.19 |          | 13.00           |                   |
| C13                                                                           | 7.42  | 5.66 | 2.12 | 2.44 | 4.85 | 4.17 | 5.39     |                 | 8.39/6.55         |
| A14                                                                           | 8.30  | 6.24 | 2.66 | 2.92 | 4.99 | 4.39 | 7.68     |                 |                   |
| T15                                                                           | 7.04  | 5.68 | 1.98 | 2.37 | 4.81 |      | 1.43     | 13.55           |                   |
| (Z)G16                                                                        | 7.68  | 5.91 | 2.52 | 2.71 | 4.86 | 4.33 |          | 12.59           |                   |
| (E)G16                                                                        | 7.69  | 5.87 | 2.52 | 2.67 | 4.88 | 4.33 |          | 12.54           |                   |
| (Z)C17                                                                        | 7.12  | 5.57 | 2.03 | 2.32 | 4.64 | 4.07 | 5.24     |                 | 8.26/6.37         |
| (E)C17                                                                        | 7.24  | 5.68 | 2.10 | 2.33 | 4.71 |      | 5.28     |                 | 8.35/6.37         |
| (Z)G18                                                                        | 7.53  | 5.84 | 2.65 | 2.47 | 4.75 | 4.24 |          | 12.54           |                   |
| (E)G18                                                                        | 7.58  | 5.86 | 2.66 | 2.49 | 4.77 | 4.27 |          | 12.53           |                   |
| (Z)T19                                                                        | 7.30  | 5.78 | 2.48 | 2.11 | 4.86 |      | 1.31     | 13.71           |                   |
| (E)T19                                                                        | 7.30  | 5.79 | 2.48 | 2.11 | 4.86 |      | 1.31     | 13.71           |                   |
| (Z)A20                                                                        | 8.23  | 6.17 | 2.81 | 2.63 | 4.98 | 4.37 | 7.52     |                 |                   |
| (E)A20                                                                        | 8.23  | 6.17 | 2.81 | 2.63 | 4.98 | 4.37 | 7.49     |                 |                   |
| C21                                                                           | 7.24  | 5.63 | 2.24 | 1.83 | 4.75 |      | 5.29     |                 | 8.27/6.74         |
| G22                                                                           | 7.84  | 6.09 | 2.32 | 2.54 | 4.61 | 4.12 |          | 13.01           |                   |

Chemical shifts are in ppm. Chemical shifts of the H6'/H6'' protons of cFapy are 0.97/1.98 ppm and 0.96/2.07 ppm for the Z and E isomers, respectively.

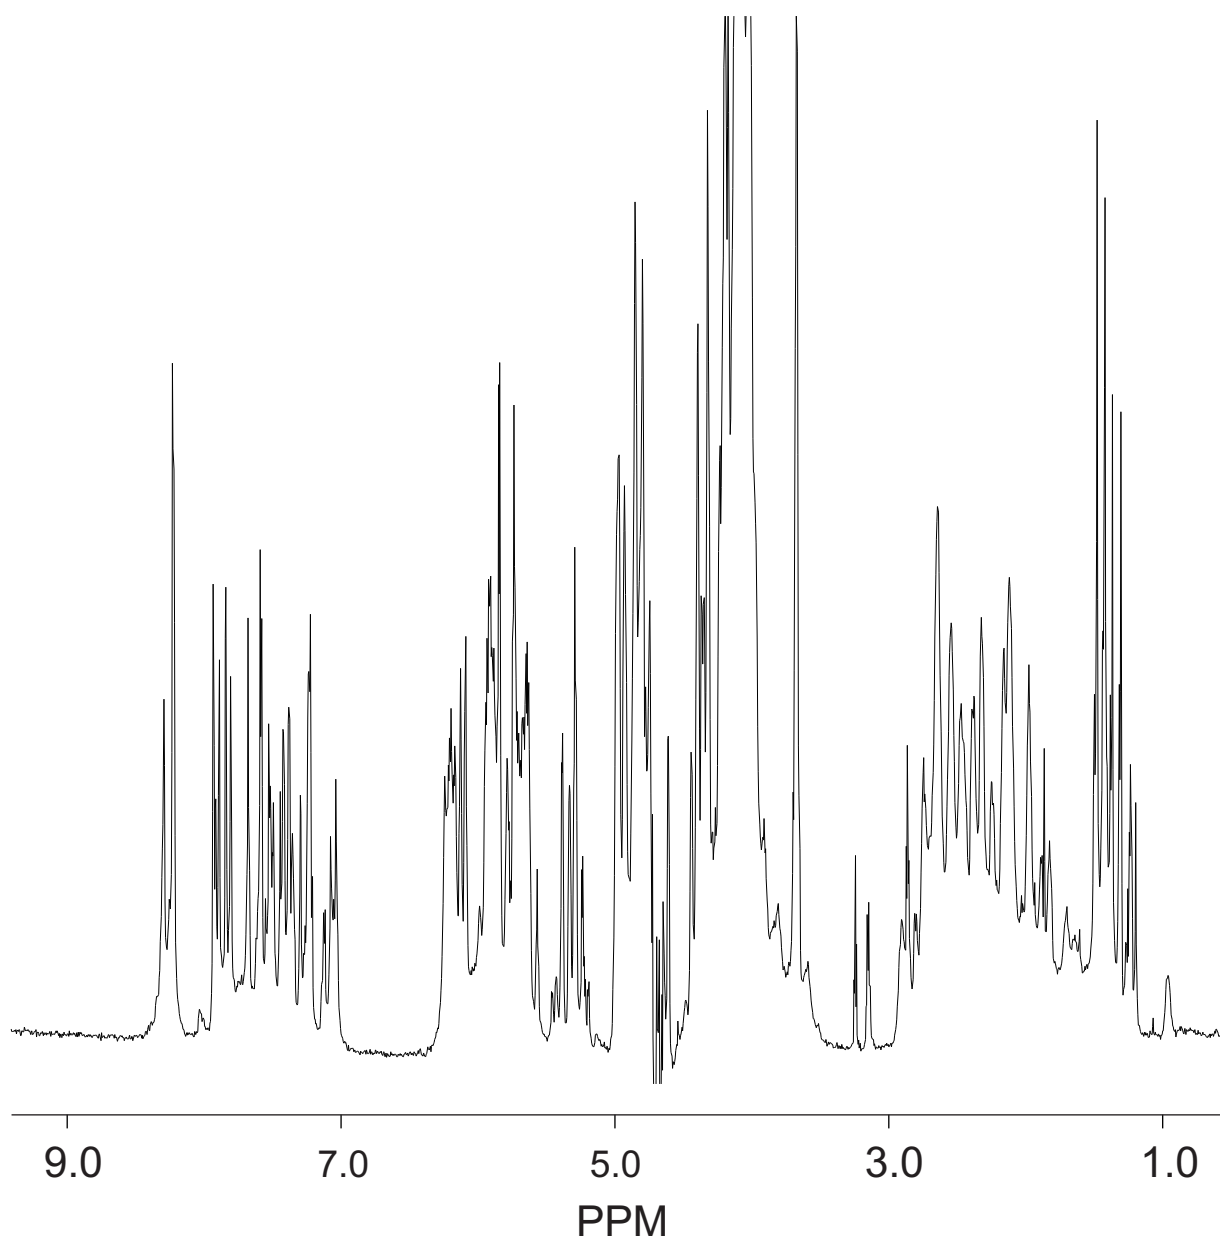

**Figure 1S.** One dimensional proton spectrum of the cFapy-dG·dC duplex recorded at 600 MHz in 100% D<sub>2</sub>O buffer, at 25 °C.

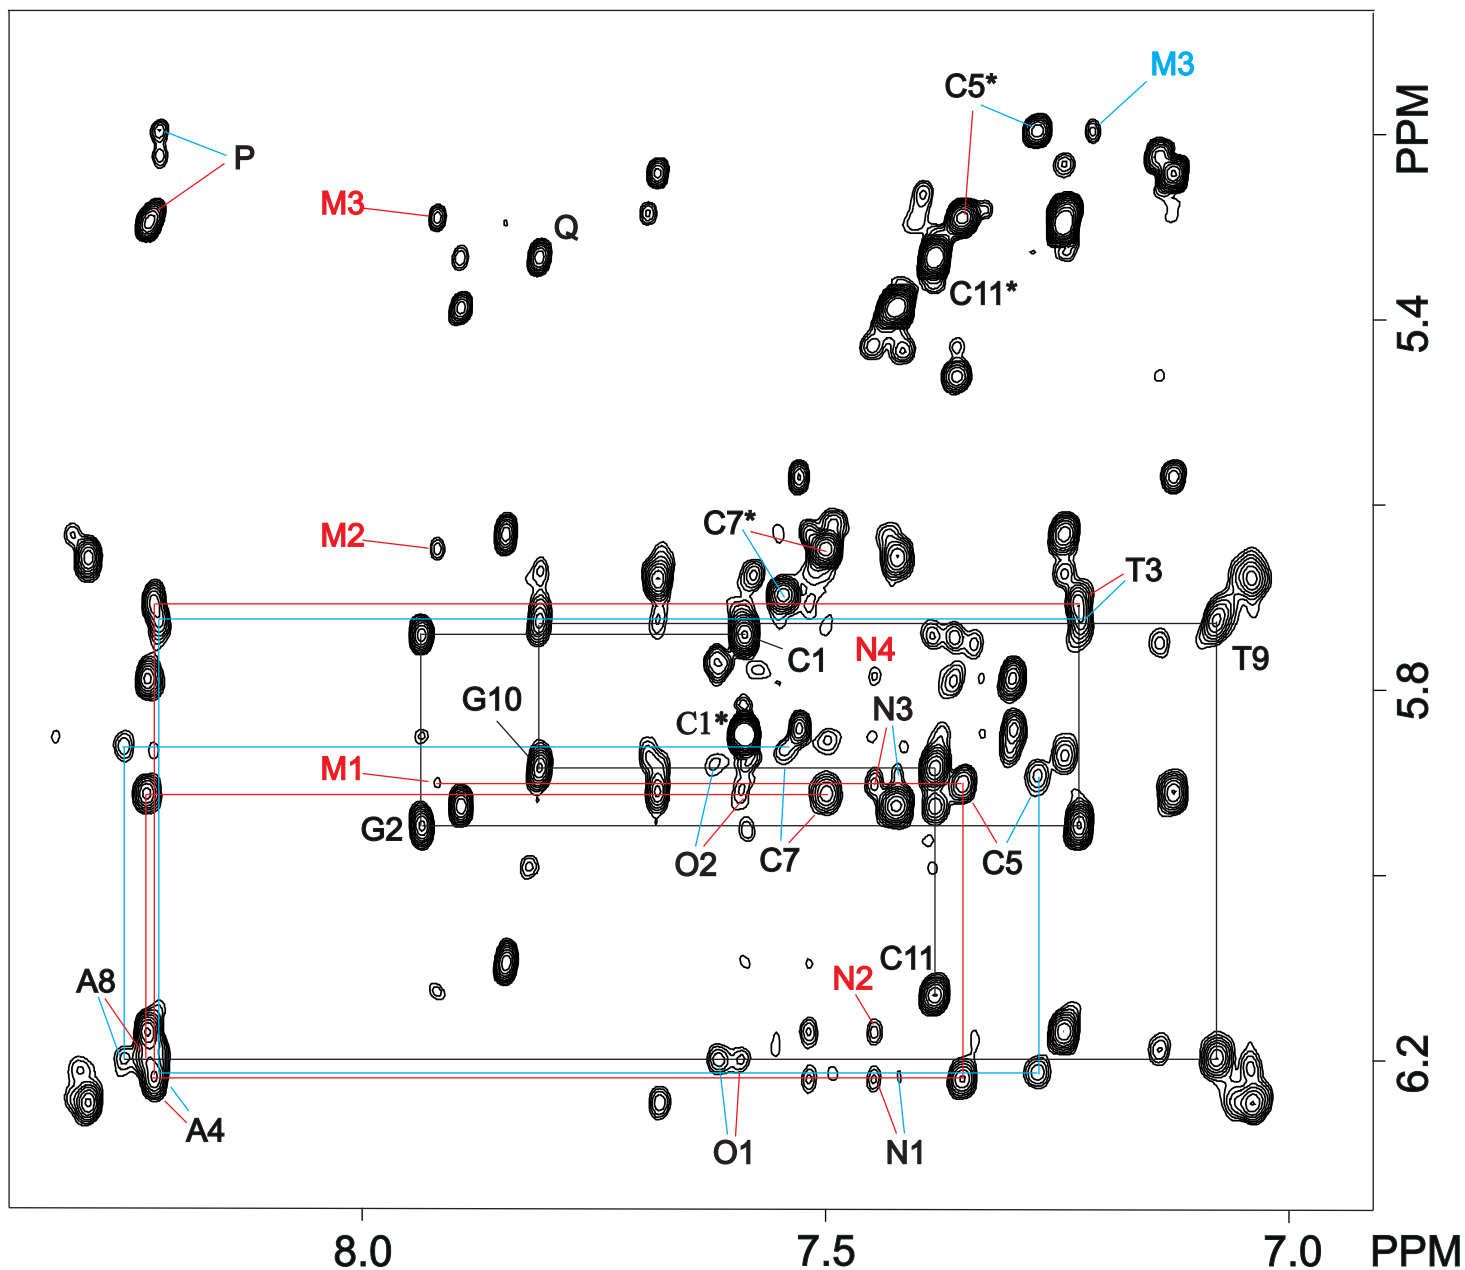

Figure 2SA. Expanded contour plot depicting NOE interactions in the base to H1' proton region of a 800 MHz NOESY spectrum (300 ms. mixing time) recorded in 100% D<sub>2</sub>O buffer, at 25 °C. Lines connect inter residue and sequential base-H1' NOE peaks seen in the modified strand of the damaged duplex. Red and blue colors trace these connectivities on the *Z* and *E* isomeric duplexes, respectively. Numbered letters label the intra residue NOE, and asterisks indicate cytosine(H5-H6) peaks. Other labels are assigned as follows: M1, F6H8-C5H1'; M2, F6H8-C7H5; M3, F6H8-C5H5; N1, A4H2-A4H1'; N2, A4H2-A20-H1'; N3, A4H2-C5H1'; N4, A4H2-T19H1'; O1, A8H2-A8H1'; O2, A8H2-G16H1'; P, A4H8-C5H5; Q, G10H8-C11H5.

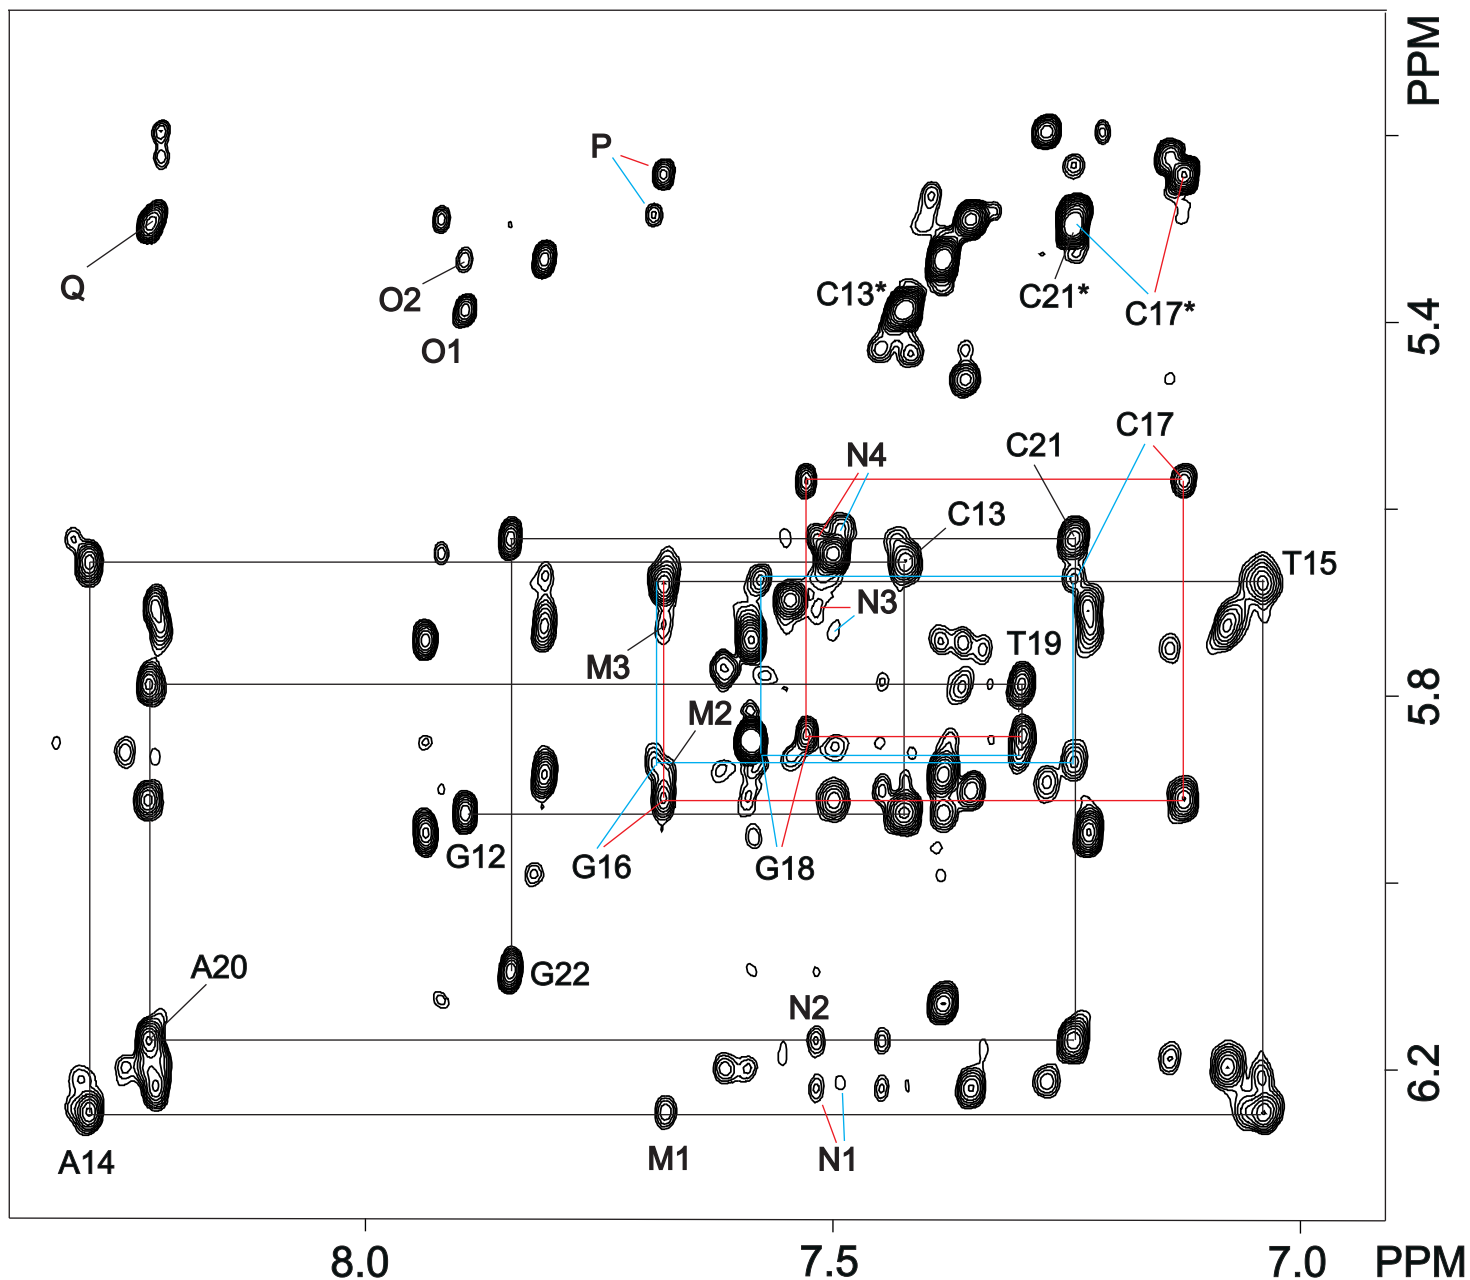

Figure 2SB. Expanded contour plot depicting NOE interactions in the base to H1' proton region of an 800 MHz NOESY spectrum (300 ms. mixing time) recorded in 100% D<sub>2</sub>O buffer, at 25 °C. Lines connect inter residue and sequential base-H1' NOE peaks seen in the unmodified strand of the damaged duplex. Red and blue colors trace these connectivities in the Z and E isomeric duplexes, respectively. Numbered letters label the intra residue NOE, and asterisks indicate cytosine(H5-H6) peaks. Other labels are assigned as follows: M1, A14H2-A14H1'; M2, A14H2-G10H1'; A3, A14H2-T9H1'; N1, A20H2-A4H1'; N2, A20H2-A20-H1'; N3, A20H2-T3H1'; N4, A20H2-C21H1'; O1, G12H8-C13H5; O2, G12H8-C11H5; P, G16H8-C17H5; Q, A20H8-C21H5.

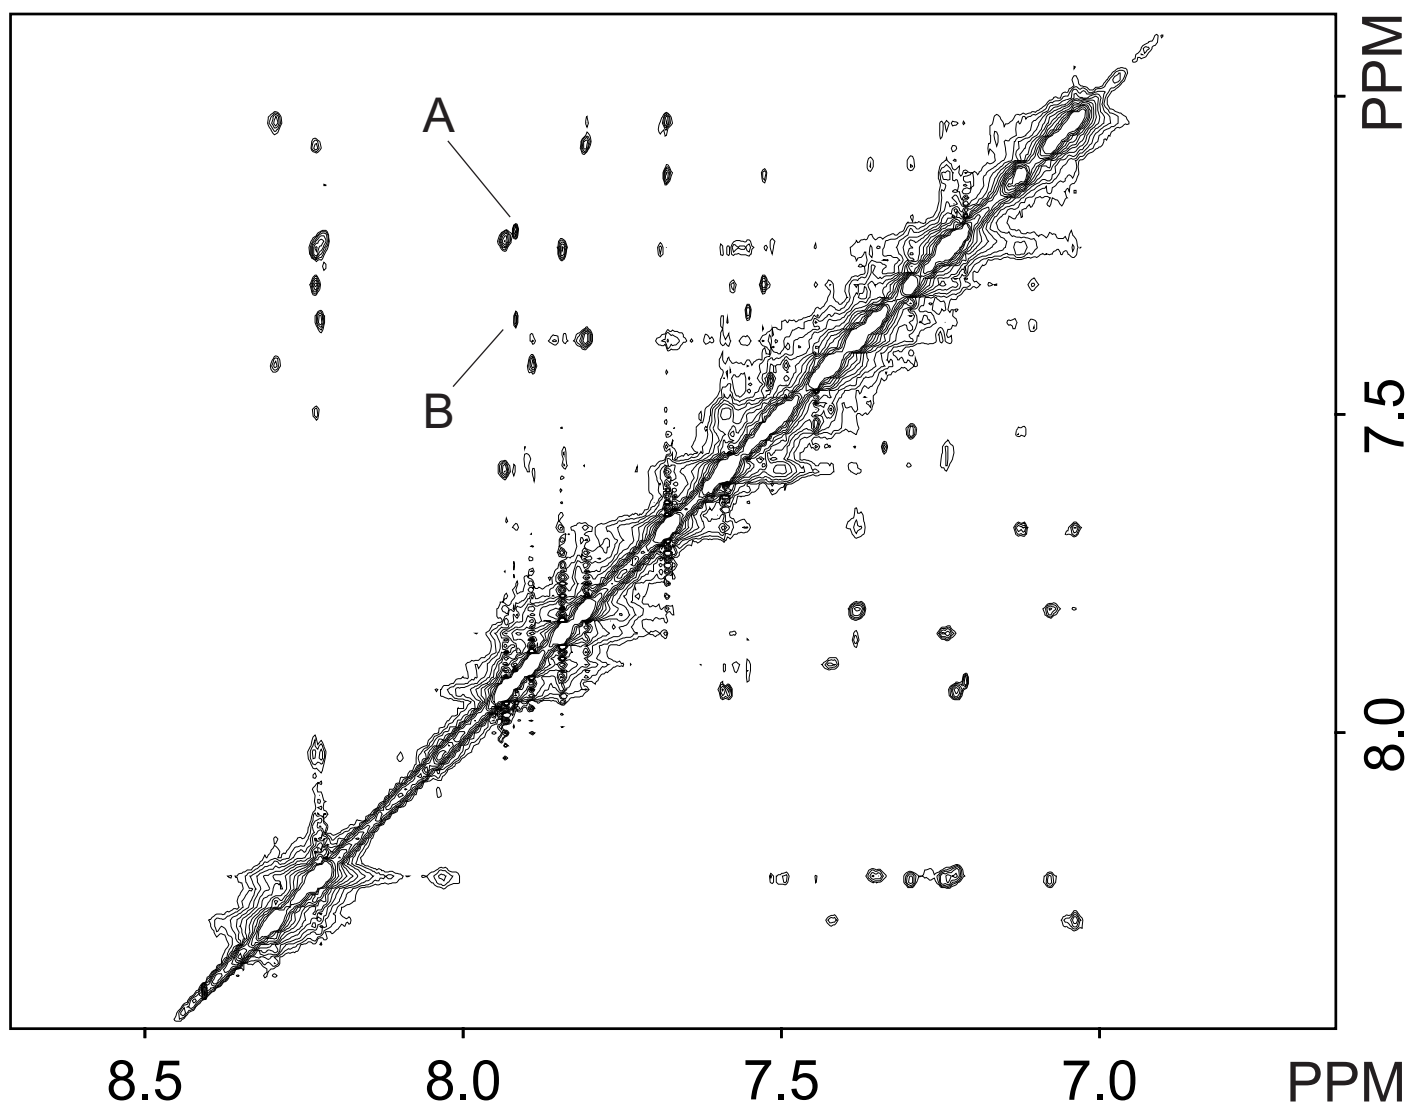

Figure 3S. Expanded contour plot showing the aromatic proton region of an 800 MHz NOESY spectrum (300 ms. mixing time) recorded in 100% D<sub>2</sub>O buffer at 25 °C. Labeled peaks are assigned as follows: A, Z-F6(HCO)-E-F6(HCO) exchange cross-peaks; B, Z-F6(HCO)-C5(H6).

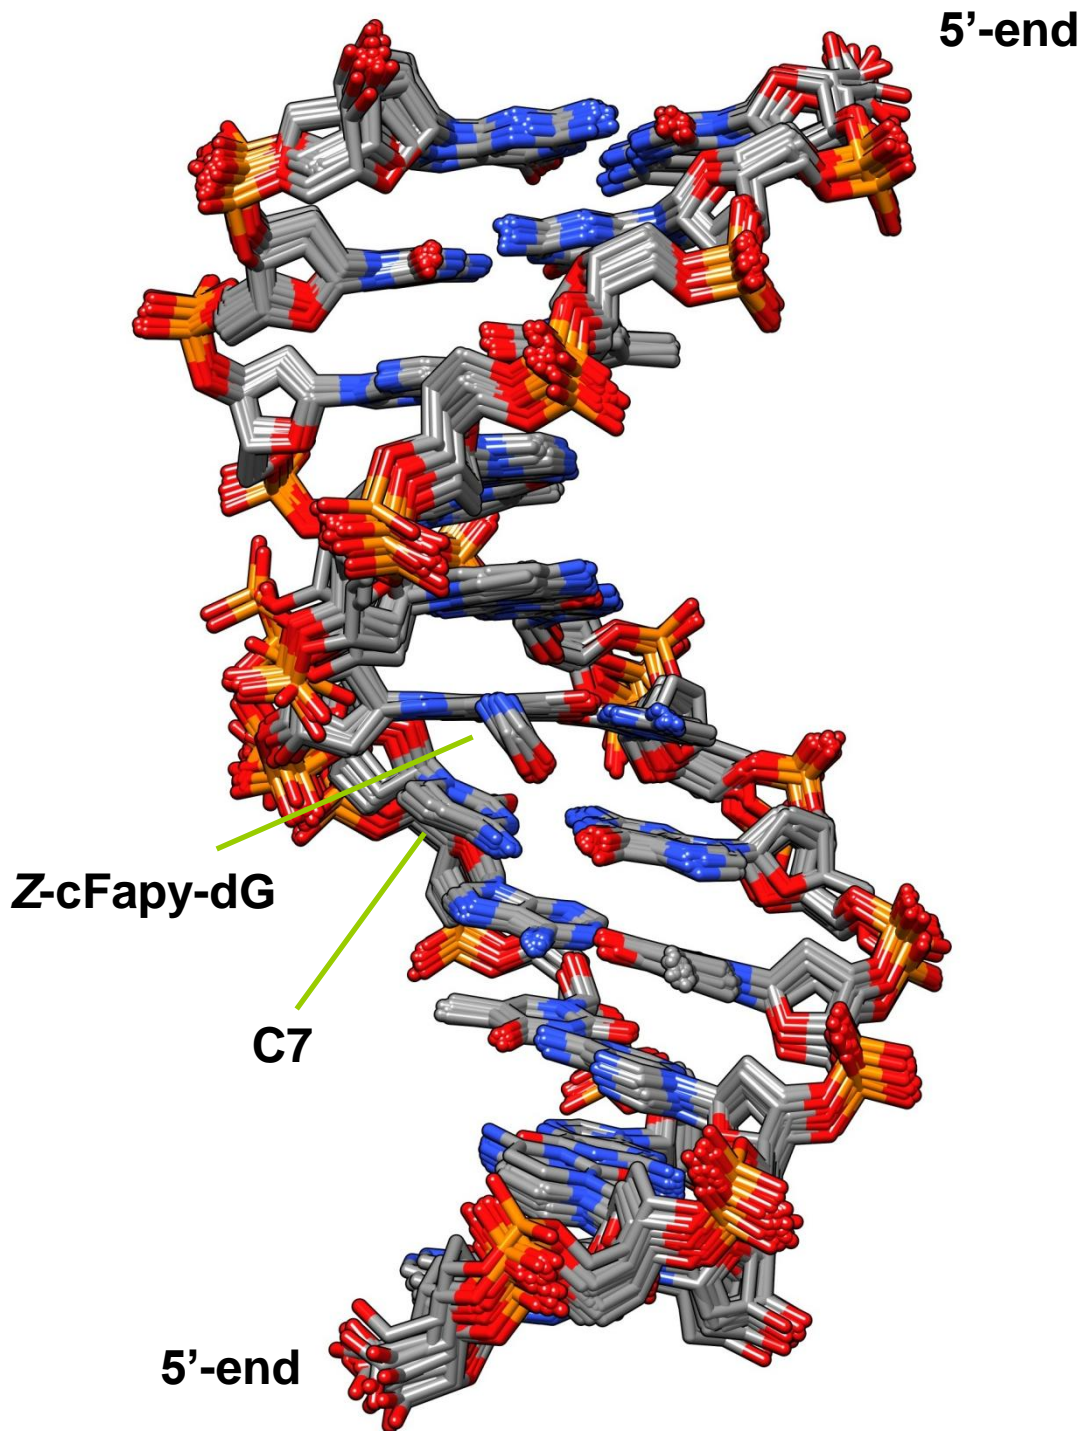

Figure 4S: Superposition of the final 25 structures of the Z-cFapy-dG•dC duplex seen with the major groove prominent.

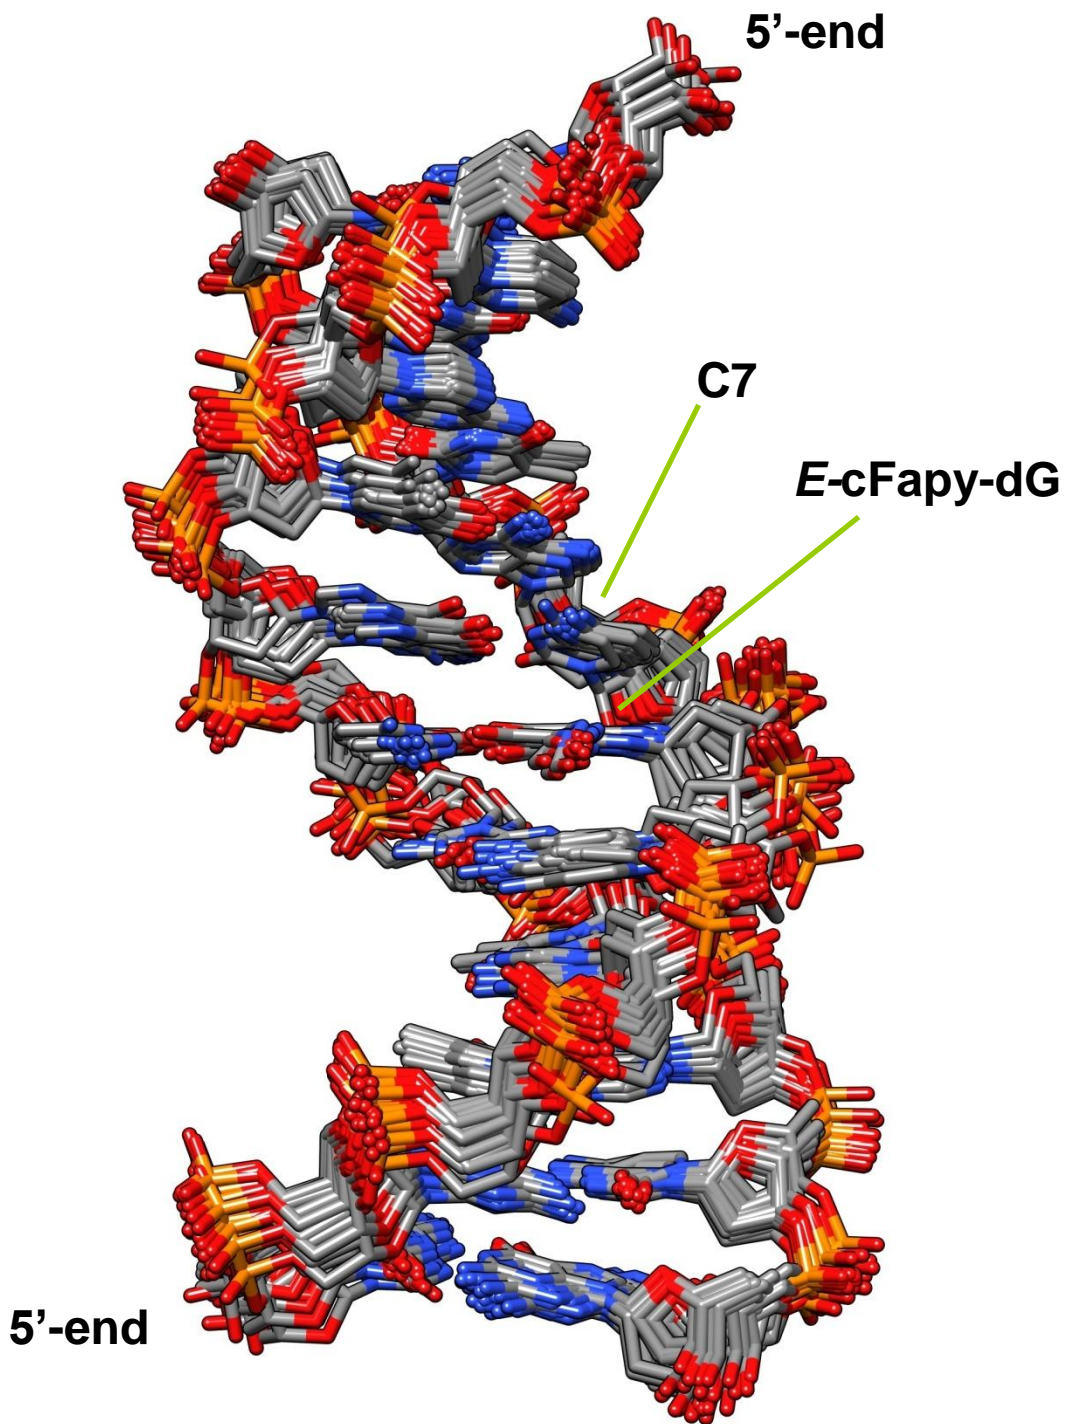

Figure 5S: Superposition of the final 25 structures of the *E*-cFapy-dG•dC duplex seen with the major groove prominent.



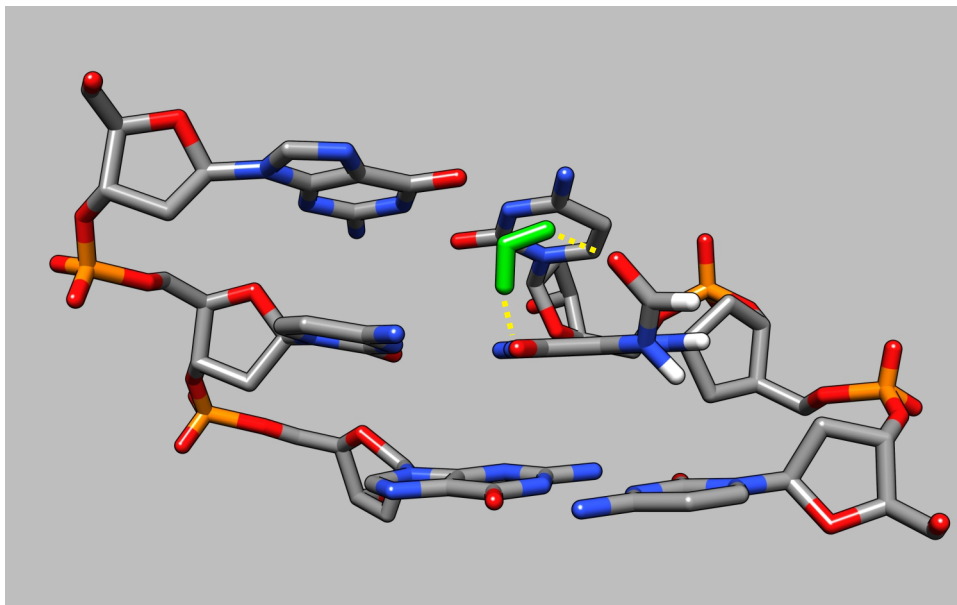

Z-cFapy-dG

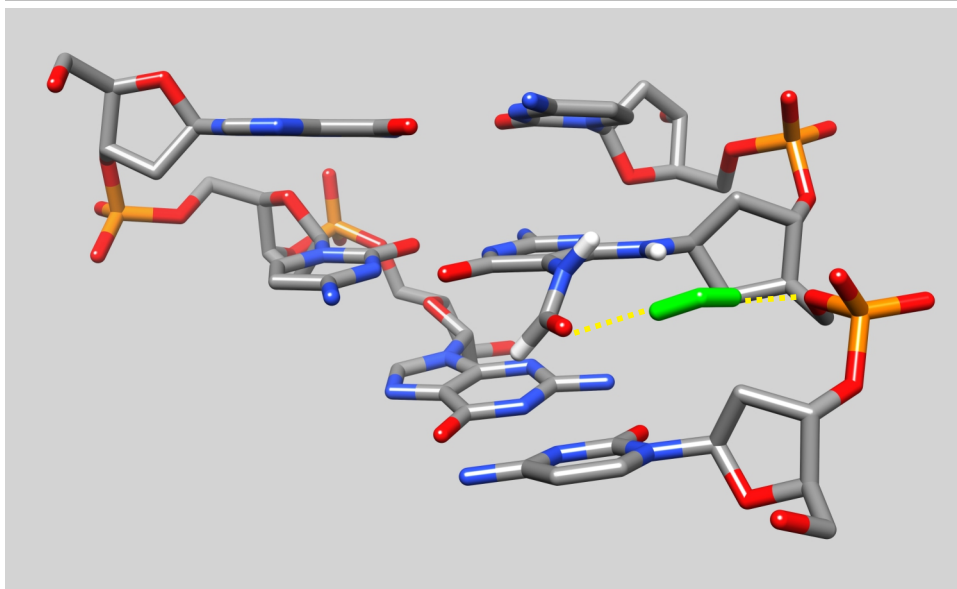

*E*-cFapy-dG  
(major form)

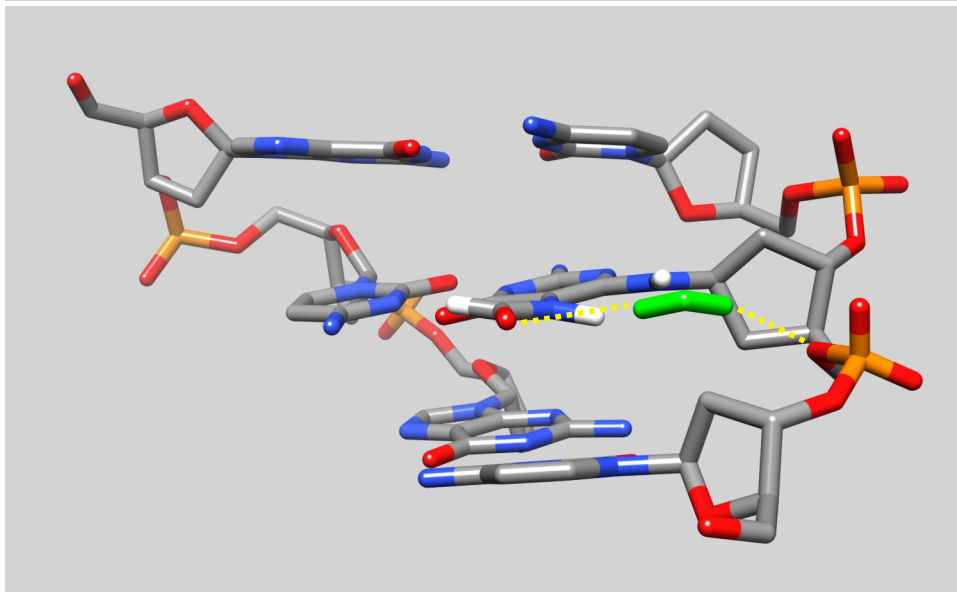

*E*-cFapy-dG  
(minor form)

Figure 6S: Examples of water-mediated hydrogen bonds in the  $\beta$ -cFapy-dG•dC duplex. Water molecules are colored green.

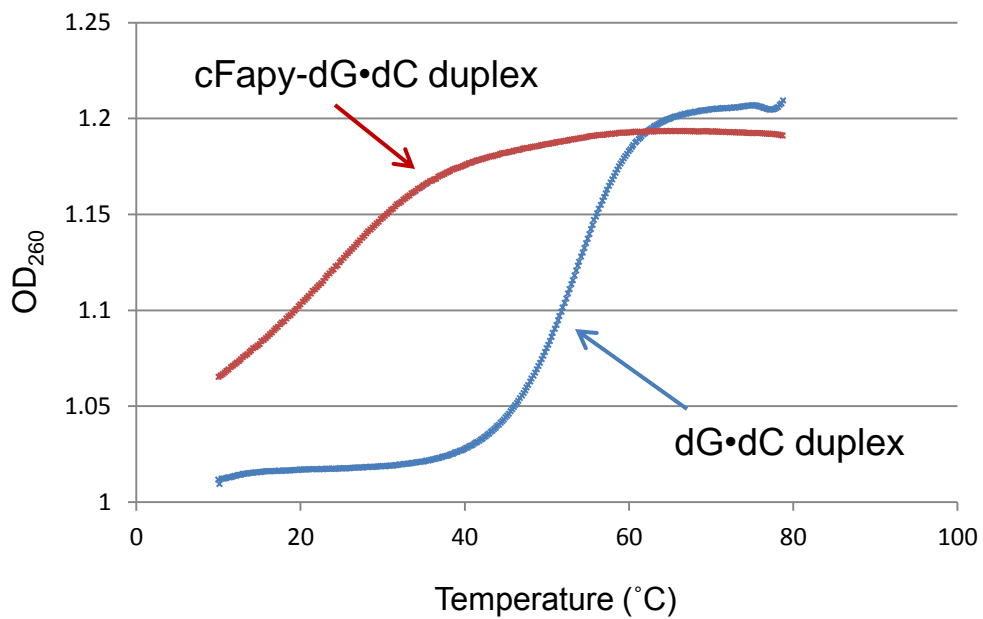

Figure 7S: UV melting profiles of the cFapy-dG•dC and dG•dC duplexes.
